# Supplementary material
Source: Springer Nature journal article supplement (https://www.springermedizin.de/resource/supplementary/12879_2013_2443_MOESM4_ESM.pdf/9444590)
Supplement: MOESM4 [file 9444590]

Table 4: Bivariate associations of the levels of adherence to ART with behavioral, clinical, food & diet related factors among study participants in Tigray regional state, northern Ethiopia, 2012

| Characteristics of study participants                                       | Status of adherence to ART        |                               | COR (95%CI)     |
|-----------------------------------------------------------------------------|-----------------------------------|-------------------------------|-----------------|
|                                                                             | Non-adherent to ART<br>Number (%) | Adherent to ART<br>Number (%) |                 |
| Daily eating pattern of last 12 months                                      |                                   |                               |                 |
| Three meals & above                                                         | 21(12.1)                          | 17(9.8)                       | 1               |
| Two meals & eating between meals                                            | 136(78.2)                         | 140(80.5)                     | 0.8(0.4 – 1.6)  |
| Two meals or less                                                           | 17(9.8)                           | 17(9.8)                       | 0.8(0.3 – 2.3)  |
| Source of food in the last 12 months                                        |                                   |                               |                 |
| Purchase (market/grocery)                                                   | 148(85.1)                         | 144(82.8)                     | 1               |
| Household farm/garden                                                       | 11(6.3)                           | 15(8.6)                       | 0.7(0.3 – 1.6)  |
| Support from others                                                         | 15(8.6)                           | 15(8.6)                       | 0.9(0.4 – 2.2)  |
| Adjusted mean HGB of the latest four visits (mg/dl)                         |                                   |                               |                 |
| <11.5                                                                       | 29(16.7)                          | 3(1.7)                        | 14(3.3 – 58.8)  |
| ≥11.5                                                                       | 145(83.3)                         | 171(98.3)                     | 1               |
| Mean TLC of the latest four visits (10 <sup>6</sup> cells/mm <sup>3</sup> ) |                                   |                               |                 |
| <4.0                                                                        | 28(16.1)                          | 11(6.3)                       | 2.7(1.3 – 5.60) |
| ≥4.0                                                                        | 146(83.9)                         | 163(93.7)                     | 1               |
| Occupation                                                                  |                                   |                               |                 |
| • Have no Job                                                               | 26(14.9)                          | 44(25.3)                      | 1               |
| • Government employed                                                       | 42(24.1)                          | 46(26.4)                      | 1.6(0.8 – 3.2)  |
| • Self employed/business                                                    | 54(31)                            | 36(20.7)                      | 2.7(1.3 – 5.3)  |
| • Daily laborer                                                             | 52(29.9)                          | 48(27.6)                      | 1.8(1.0 – 3.4)  |

|                                                 |           |           |                  |
|-------------------------------------------------|-----------|-----------|------------------|
| Duration of treatment (months)                  |           |           |                  |
| 12 – 36                                         | 33(19)    | 28(16.1)  | 1                |
| 37 – 60                                         | 72(41.4)  | 93(53.5)  | 0.6(0.4 – 1.2)   |
| ≥61                                             | 69(39.6)  | 53(30.4)  | 1.1(0.6 – 2.0)   |
| Current alcohol consumption<br>(within 30 days) |           |           |                  |
| Yes                                             | 73(42)    | 11(6.3)   | 13.4(5.4 – 33.2) |
| No                                              | 101(58)   | 163(93.7) | 1                |
| Ever use of alcohol after starting<br>ART       |           |           |                  |
| Yes                                             | 140(80.5) | 89(51.1)  | 4.9(2.7 – 8.9)   |
| No                                              | 34(19.5)  | 85(48.9)  | 1                |
| PHQ-9 score for depression<br>(Points)          |           |           |                  |
| <5                                              | 53(30.5)  | 115(66.1) | 1                |
| ≥5                                              | 121(69.5) | 59(33.9)  | 5.1(3.0 – 8.9)   |
| Current khat chewing (within 30<br>days)        |           |           |                  |
| Yes                                             | 17(9.8)   | 7(4)      | 2.4(1.0 – 5.9)   |
| No                                              | 157(90.2) | 167(96)   | 1                |

N.B:- TLC=Total Leukocyte Count, HGB=hemoglobin NGO=Non-Government Organization, PHQ=Patient Health Questionnaire
